# Supplementary material for: Extremely Low-Frequency Electromagnetic Fields Increase Cytokines in Human Hair Follicles through Wnt/β-Catenin Signaling
Source: MDPI journal article supplement (doi:10.3390/biomedicines10040924), 2022-04-18
Supplement: s1 [file s1]

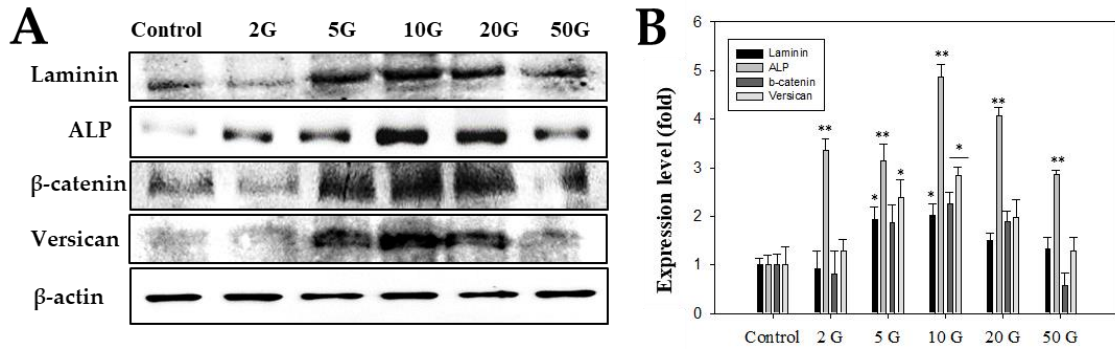

**Figure S1.** (A) Protein expression levels detected in human hair follicles (HFs) treated with ELF-EMF. Protein expression of  $\beta$ -catenin, Wnt3 $\alpha$ , ALP, and versican, using  $\beta$ -actin as an internal control. (B) Relative expression intensities were calculated using ImageJ. Each bar represents the mean  $\pm$  standard error of independent experiments performed in triplicate ( $n=3$ ). Significant differences were determined by one-way ANOVA with Tukey's post hoc test (\* $P<0.05$ , \*\* $P<0.01$ ).
